# Supplementary material for: Mutational load of the mitochondrial genome predicts pathological features and biochemical recurrence in prostate cancer
Source: Aging (Albany NY). 2016 Oct 5;8(11):2702–11. doi: 10.18632/aging.101044 (PMC5191864; doi:10.18632/aging.101044)
Supplement: Supplementary file 2 [file aging-08-2702-s002.xlsx]

## Sheet: Sheet1
Table S1. Epidemiologic and clinical characteristics of patients
Study ID	AgeRP	Risk group	Haplogroup	Core: primary Gleason	Core: secondary Gleason	Core total Gleason	Purity	SNV count	cumulative AF	nonsynonymous SNV	Synonymous SNV	Pre-RP PSA	Type of RP	Time Post RP	Period disease free	Cause of death	RP: Primary Gleason	RP: Secondary Gleason	Gleason prostatectomy	Pathological stage	Outcome
A001	61	GS 7	H1m	3	3	6	50	0	0	0	0	7	Open	123.2	7.6		3	4	7	PT2C	Nil relapse at last FU
A002	64	GS 7	U4a3a	3	4	7	70	1	0.509963	0	1	6	Open	140.8			4	3	7	PT3A	Nil relapse at last FU
A003	54	GS 8+	H6a2	4	3	7	80	2	1.33511	1	1	4	Open	149.7	56.1		4	5	9	PT3A	Biochemical Recurrence
A004	55	GS 6	H5g	3	3	6	50	1	1.60259	1	0	6.2	Open	140.2			3	3	6	PT2C	Nil relapse at last FU
A005	52	GS 8+	Undetermined	3	3	6	55	1	0.38132	0	1	6.7	Open	137.7			3	5	8	PT4	Nil relapse at last FU
A006	52	GS 8+	J1c3	4	4	8	70	2	2.05613	1	1	16.5	Open	142.6	20.1		4	4	8	PT2C	Biochemical Recurrence
A007	74	GS 7	U5a1d1	3	4	7	60	2	1.81033	1	1	13.7	Open	106	12.4		3	4	7	PT3A	Biochemical Recurrence
A008	69	GS 8+	N1b1b1	3	3	6	40	0	0	0	0	8.4	Open	125			3	5	8	PT3A	Nil relapse at last FU
A009	66	GS 6	K2b1a1	3	4	7	20	0	0	0	0	12	Open	141.8			3	3	6	PT2C	Nil relapse at last FU
A010	60	GS 7	H5a1j	3	3	6	70	1	0.652796	0	1	13	Open	143.4			4	3	7	PT3A	Nil relapse at last FU
A011	62	GS 7	H50	3	3	6	40	0	0	0	0	3.1	Open	142.1			3	4	7	PT2C	Nil relapse at last FU
A012	64	GS 8+	U5a1a1	4	3	7	35	1	1.17035	1	0	11.5	Open	142.8	18.9		4	5	9	PT3B	PSA + boney + dist visc mets
A013	54	GS 8+	H3	3	3	6	65	0	0	0	0	10.7	Open	141.9	21	Prostate Cancer	4	5	9	PT3B	Death from PCa
A014	62	GS 7	J2a1a1a2	4	3	7	60	3	3.24624	0	3	16.4	Open	127.4	87		4	3	7	PT3A	Biochemical Recurrence
A015	66	GS 7	H1b1	4	4	8	75	0	0	0	0	9.24	Open	112.9	85.6		4	3	7	PT3A	Biochemical Recurrence
A016	58	GS 6	H17a	3	4	7	70	2	0.71821	1	1	7.5	Open	140.5		Pancreas Cancer	3	3	6	PT2C	Nil relapse at last FU
A017	73	GS 8+	H3	4	4	8	50	3	2.81024	1	2	7.4	Open	135	1.1		4	5	9	PT3B	RP not curative
A018	57	GS 7	B4a1e	3	3	6	60	1	1.48791	0	1	13.7	Open	107.4			3	4	7	PT3A	Nil relapse at last FU
A019	55	GS 7	W	3	4	7	60	1	0.952548	0	1	5	Open	135.2			3	4	7	PT2A	Nil relapse at last FU
A020	62	GS 7	H7c	3	4	7	80	0	0	0	0	8.4	Open	139.8			4	3	7	PT3A	Nil relapse at last FU
A021	54	GS 7	H1a1	3	3	6	65	0	0	0	0	6.5	Open	133.4			3	4	7	PT2C	Nil relapse at last FU
A022	68	GS 7	T2b5a	3	4	7	40	1	1.7879	1	0	10	Open	145.5	11.9		3	4	7	PT3A	Biochemical Recurrence
A023	62	GS 7	H1c8	4	3	7	70	2	2.008	1	1	11.1	Open	133.5	38.9		3	4	7	PT2C	Biochemical Recurrence
A024	63	GS 7	T2e?	4	3	7	70	3	2.69586	0	3	11.58	Open	114.6			3	4	7	PT2C	Nil relapse at last FU
A025	63	GS 7	U5a1+|16192	3	3	6	50	0	0	0	0	6.7	Open	97.5			4	3	7	PT2A	Nil relapse at last FU
A026	57	GS 7	T2b3b	3	3	6	20	1	1.73005	1	0	9.1	Open	114.3			3	4	7	PT2C	Nil relapse at last FU
A027	62	GS 8+	M30+16234	3	3	6	70	0	0	0	0	9	Open	136.8			4	5	9	PT2C	Nil relapse at last FU
A028	59	GS 8+	K1a1	4	4	8	70	0	0.665664	0	0	6.3	Open	140.5	6.7		4	4	8	PT3A	PSA + boney metastasis
A029	54	GS 6	H1b	3	3	6	50	0	0	0	0	5.1	Open	139.8			3	2	5	PT2C	Nil relapse at last FU
A030	68	GS 7	Undetermined	3	4	7	60	0	0	0	0	6.1	Open	137.7			4	3	7	PT2C	Nil relapse at last FU
A031	64	GS 7	M42a	3	4	7	60	0	0	0	0	5.6	Open	137.5			3	4	7	PT2C	Nil relapse at last FU
A032	70	GS 7	J1c3	3	3	6	60	0	0	0	0	5.2	Open	125.3			3	4	7	PT2C	Nil relapse at last FU
A033	60	GS 7	U5b1c2	3	3	6	55	0	0	0	0	8.5	Open	123.5	24.9		4	3	7	PT3A	PSA + boney metastasis
A034	61	GS 7	T2b2b	3	4	7	75	0	0	0	0	5.5	Open	129.1			4	3	7	PT2C	Nil relapse at last FU
A035	64	GS 7	J1c2	4	3	7	75	0	0	0	0	8.5	Open	137.3			4	3	7	PT2A	Nil relapse at last FU
A036	65	GS 6	N1b1a3	3	3	6	60	0	0	0	0	4.16	Open	52.4			3	3	6	PT2C	Nil relapse at last FU
A037	60	GS 8+	H5b2	4	3	7	80	2	0.983609	0	2	11.7	Open	138.5	43.3		4	5	9	PT3A	PSA + boney metastasis
A038	64	GS 6	HV0d	3	4	7	40	0	0	0	0	2.43	Open	72.7			3	3	6	PT2A	Nil relapse at last FU
A039	59	GS 7	K1c2	3	4	7	70	1	0.312299	1	0	120.6	Open	98.1			4	3	7	PT3A	Biochemical Recurrence
A040	58	GS 6	U2e1e	3	3	6	60	0	0	0	0	130.2	Open			7.3	3	3	6	PT2C	Nil relapse at last FU
A041	59	GS 6	H51	3	4	7	35	0	0	0	0	133.2	Open			7.4	3	3	6	PT2C	Nil relapse at last FU
A042	56	GS 7	K1a+150	4	5	9	80	1	1.11636	0	1	103.4	Open	28.3		4.5	4	3	7	PT3A	Biochemical Recurrence
A043	66	GS 7	R1a1a2	3	4	7	50	0	0	0	0	131.4	Open	45.8		16.3	3	4	7	PT3B	PSA + boney + dist visc mets
A044	60	GS 6	Undetermined	3	3	6	50	0	0	0	0	113	Open	35.6		11.9	3	3	6	PT2	Biochemical Recurrence
A045	58	GS 7	H1a6	3	4	7	70	1	0.753069	0	1	128.5	Open			2.5	3	4	7	PT3A	Nil relapse at last FU
A046	59	GS 7	J1c2b	3	3	6	70	2	1.6739	1	1	87.3	Open	71.5		4.89	3	4	7	PT3A	Biochemical Recurrence
A047	65	GS 7	H11a	4	3	7	40	0	0	0	0	118.5	Open			4.7	3	4	7	PT2B	Nil relapse at last FU
A048	46	GS 6	H1e2c	3	3	6	20	0	0	0	0	132	Open			6.3	3	3	6	PT2C	Nil relapse at last FU
A049	52	GS 6	M1a1b	3	3	6	20	0	0	0	0	128.9	Open			4.9	3	3	6	PT2C	Nil relapse at last FU
A050	58	GS 7	H1bd	4	3	7	40	0	0	0	0	131	Open			4.9	4	3	7	PT3A	Nil relapse at last FU
A051	66	GS 7	H1af1a	3	4	7	70	0	0	0	0	131.3	Open			8.5	3	4	7	PT3A	Nil relapse at last FU
A052	56	GS 6	H7	3	3	6	50	0	0	0	0	127	Open			4.5	3	3	6	PT2C	Nil relapse at last FU
A053	69	GS 7	T2b7a	3	3	6	50	0	0	0	0	63.1	Open		Pancreas Cancer	8	3	4	7	PT2C	Nil relapse at last FU
A054	54	GS 6	H1am1	3	4	7	60	2	0.559948	0	2	129.4	Open	81.9		6.1	3	3	6	PT2B	Biochemical Recurrence
A055	67	GS 7	H1n1	3	3	6	60	0	0	0	0	121.5	Open	97		11.2	3	4	7	PT2C	Biochemical Recurrence
A056	73	GS 7	H6a1b	3	3	6	60	2	1.66166	0	2	96.3	Open			5.8	3	4	7	PT3A	Nil relapse at last FU
A057	66	GS 7	I4a	3	4	7	50	1	1.4664	1	0	126.2	Open	126.2		11	3	4	7	PT2C	Biochemical Recurrence
A058	55	GS 6	H2a2b1	3	3	6	5	0	0	0	0	130.6	Open			6.6	3	2	5	PT2C	Nil relapse at last FU
A059	63	GS 6	H49a	3	3	6	60	0	0	0	0	131.7	Open			5.2	3	3	6	PT2	Nil relapse at last FU
A060	58	GS 8+	X2c1a	4	3	7	70	0	0	0	0	58.7	Open	29.9		7.1	4	5	9	PT3B	Biochemical Recurrence
A061	68	GS 7	U5a1a1e	3	4	7	60	1	0.387265	1	0	130.8	Open			9.04	3	4	7	PT2C	Nil relapse at last FU
A062	59	GS 7	K1c1b	3	3	6	70	1	0.876537	0	1	126	Open			4.4	3	4	7	PT2A	Nil relapse at last FU
A063	66	GS 7	H13a2b2	3	3	6	65	1	0.419766	1	0	90.4	Open			10	3	4	7	PT2C	Nil relapse at last FU
A064	49	GS 7	H4a1a4b	3	4	7	60	0	0	0	0	124.3	Open			4.5	3	4	7	PT2C	Nil relapse at last FU
A065	64	GS 7	J1c3g	4	3	7	60	0	0	0	0	117.7	Open			13.3	4	3	7	PT2C	Nil relapse at last FU
A066	70	GS 7	Undetermined	3	3	6	30	0	0	0	0	130.8	Open	25.5		12.5	4	3	7	PT3A	Biochemical Recurrence
A067	55	GS 6	H7b1	3	3	6	70	0	0	0	0	107.2	Open			5.5	3	3	6	PT2C	Nil relapse at last FU
A068	68	GS 8+	K2a2a1	4	4	8	70	0	0	0	0	111.7	Open	1.7	Prostate Cancer	6.8	4	5	9	PT3B	Death from PCa
A069	59	GS 6	V+|16298	3	3	6	40	0	0	0	0	98.7	Open			9.8	3	3	6	PT2C	Nil relapse at last FU
A070	58	GS 8+	H1as2	3	4	4	30	0	0	0	0	107.1	Open	1.1		8.6	4	4	8	PT3A	RP not curative
A071	57	GS 6	U5a2a1+152	3	3	6	75	0	0	0	0	68.8	Open			12	3	3	6	PT3A	Nil relapse at last FU
A072	70	GS 8+	H20a	4	5	9	60	0	0	0	0	105.4	Open			5.1	4	4	8	PT3A	Nil relapse at last FU
A073	56	GS 6	H1a	3	3	6	60	0	0	0	0	91	Open			6.2	3	3	6	PT2C	Nil relapse at last FU
A074	70	GS 8+	J1c15a	3	4	7	60	2	0.958803	1	1	100.6	Open	77.6		7.8	4	5	9	PT3A	Biochemical Recurrence
A075	63	GS 8+	H52	4	5	9	80	3	2.14324	0	3	104.9	Open	7		3.7	4	5	9	PT3A	PSA + boney metastasis
A076	55	GS 8+	H3n	3	3	6	25	0	0	0	0	81.2	Open	12.2		13	4	5	9	PT3B	PSA + boney metastasis
A077	65	GS 6	T2b1	3	3	6	35	0	0	0	0	51.3	Open			5.3	3	3	6	T2C	Nil relapse at last FU
A078	52	GS 6	U3a1c	3	3	6	45	0	0	0	0	91.6	Open			5	3	3	6	PT2C	Nil relapse at last FU
A079	67	GS 6	H5a1	3	3	6	45	0	0	0	0	72	Open			5.6	3	3	6	PT2C	Nil relapse at last FU
A080	62	GS 8+	H3b1a	3	4	7	70	4	2.91752	0	4	96.4	Open			4.2	4	4	8	PT3B	Nil relapse at last FU
A081	61	GS 8+	H7h	4	4	8	75	1	0.430905	1	0	78.3	Open	36		15.1	4	5	9	PT3B	Biochemical Recurrence
A082	54	GS 6	L2a1c6	3	3	6	25	0	0	0	0	82.4	Open			4.3	3	3	6	PT2C	Nil relapse at last FU
A083	66	GS 8+	T2e	3	3	6	55	0	0	0	0	83.9	Open			3.9	4	4	8	PT2C	Nil relapse at last FU
A084	60	GS 8+	K1a3a	5	4	9	75	1	0.443056	1	0	90.6	Open			3.5	4	5	9	PT3B	Nil relapse at last FU
A085	59	GS 8+	U7b	4	4	8	70	1	0.606976	0	1	71.6	Open			3.6	4	4	8	PT3A	Nil relapse at last FU
A086	57	GS 8+	HV15	3	3	6	50	0	0	0	0	94.6	Open	39		16	4	5	9	PT3A	Biochemical Recurrence
A087	61	GS 6	U3a1c1	3	3	6	60	0	0	0	0	90.4	Open			4.3	3	3	6	PT2C	Nil relapse at last FU
A088	62	GS 6	H86	3	4	7	55	1	0.278398	1	0	62.6	Open			5.7	3	3	6	PT2C	Nil relapse at last FU
A089	56	GS 8+	H6a1a2a	4	3	7	70	1	0.666761	1	0	86.1	Open	48.9		17.1	4	4	8	PT4	Biochemical Recurrence
A090	52	GS 8+	T2f1a1	3	4	7	60	0	0	0	0	85.7	Open	1.2		18.6	4	5	9	PT4	RP not curative
A091	64	GS 8+	H1e1a	3	4	7	60	1	0.577632	0	1	82.5	Open			6.3	5	4	9	PT3A	Nil relapse at last FU
A092	53	GS 6	T2b17a	3	3	6	70	0	0	0	0	79.5	Open			3.7	3	3	6	PT2C	Nil relapse at last FU
A093	64	GS 8+	U4a2f	3	3	6	25	1	1.16058	0	1	88	Open			8.6	4	5	9	PT3B	Nil relapse at last FU
A094	64	GS 8+	U5a2b4	4	4	8	50	0	0	0	0	72.5	Open	7.4		8.1	4	4	8	PT3A	RP not curative
A095	75	GS 8+	U5b1b1+|16192	5	4	9	50	3	1.71542	1	2	88.3	Open	1.4		8.03	4	5	9	PT3A	Biochemical Recurrence
A096	66	GS 8+	H13a1a	3	3	6	55	1	0.956147	0	1	79.3	Open			5.8	4	4	8	PT3A	Nil relapse at last FU
A097	56	GS 8+	J1c3g	3	4	7	70	3	1.15087	1	2	73.7	Open	23.1		4.7	4	5	9	PT3A	Biochemical Recurrence
A098	59	GS 8+	H1a	4	3	7	55	2	1.67869	0	2	79.4	Open	1.3		8.4	4	5	9	PT3B	PSA + boney metastasis
A099	63	GS 8+	W4a1	4	4	8	85	1	1.12827	0	1	77.3	Open			11.4	4	4	8	PT2C	Nil relapse at last FU
A100	69	GS 8+	H5a1j	4	5	9	70	0	0	0	0	69.2	Open	0.9		14	4	4	8	PT3B	RP not curative
A101	65	GS 8+	H5a1j	3	4	7	49	0	0	0	0	61.6	Open			12	4	4	8	PT3A	Nil relapse at last FU
A102	61	GS 8+	J2a1a1a2	4	4	8	60	1	0.491858	0	1	64.8	Open	64		7.2	4	5	9	T3A	Biochemical Recurrence
A103	64	GS 8+	V15a	4	4	8	60	1	0.429865	1	0	51.4	Open			6.6	4	4	8	PT2	Nil relapse at last FU
A104	67	GS 8+	K2a	4	4	8	70	1	0.292117	0	1	54.7	Open			17	4	5	9	T3A	Nil relapse at last FU
A105	51	GS 8+	J1c5b	3	4	7	35	0	0	0	0	50.4	Open			4.67	4	5	9	PT3A	Nil relapse at last FU
A106	61	GS 8+	H5a6a	4	3	7	35	1	1.29347	0	1	52	Open	4.1		6.7	4	4	8	PT2	Biochemical Recurrence
A107	54	GS 8+	H1a	4	5	9	70	0	0	0	0	24.2	Davinci	1.1		4.38	4	5	9	PT2	RP not curative
A108	57	GS 8+	V10a	4	4	8	80	0	0	0	0	37.4	Open			12	4	5	9	PT3A	Nil relapse at last FU
A109	62	GS 8+	F1f	3	4	7	70	0	0	0	0	39	Open	12.9		16.5	4	5	9	PT3B	Nil relapse at last FU
A110	73	GS 8+	Undetermined	3	4	7	70	0	0	0	0	39.2	Laproscopic			4.62	4	4	8	PT3A	Nil relapse at last FU
A111	67	GS 8+	HV0+195	4	5	9	60	0	0	0	0	30.9	Open			7.7	4	5	9	PT3B	Nil relapse at last FU
A112	50	GS 8+	T2b	4	4	8	70	1	0.35951	0	1	25.6	Davinci			8.1	4	4	8	T3B	Nil relapse at last FU
A113	62	GS 8+	U5a1a1	4	5	9	40	1	0.726032	0	1	27.1	Davinci	21		4.95	5	4	9	PT3B	Biochemical Recurrence
A114	59	GS 8+	V10b	3	4	7	40	0	0	0	0	23.7	Davinci			4.5	4	5	9	PT3A	Nil relapse at last FU
A115	53	GS 8+	H48	4	3	7	65	1	0.293988	1	0	23.3	Davinci			3.5	4	5	9	T3A	Nil relapse at last FU
