# Supplementary material for: Mutational load of the mitochondrial genome predicts pathological features and biochemical recurrence in prostate cancer
Source: Aging (Albany NY). 2016 Oct 5;8(11):2702–11. doi: 10.18632/aging.101044 (PMC5191864; doi:10.18632/aging.101044)
Supplement: Supplementary file 3 [file aging-08-2702-s003.xlsx]

## Sheet: Sheet1
Table S2. SNV: Allele frequency, specimen pathology, annotation and functional prediction
Study ID	Position	NT Change	AF Blood	AF Tumour	Corrected AF	Cumulative AF	Core: primary Gleason	Core: secondary Gleason	Core: Gleason total	Cancer cells in core	Gene	(Non) Synonymous SNV	WT Amino-acid	Variant Amino-acid	Polyphen prediction	Polyphen: prediction based on	Polyphen: probability of SNV being damaging
A002	16290	T>C	0.61743	0.260456	0.509963	0.509963	3	4	7	0.7	D-loop	Non protein coding			Non protein coding
A003	3255	G>A	0	0.586493	0.733116	1.33511	4	3	7	0.8	tR-Leu1	Non protein coding			Non protein coding
A003	5296	T>C	0	0.481595	0.601994	1.33511	4	3	7	0.8	ND2	Non synonymous SNV	L	P	probably damaging	sequence annotation	0.988
A004	15330	T>C	0	0.801296	1.60259	1.60259	3	3	6	0.5	CYTB	Non synonymous SNV	L	P	probably damaging	sequence annotation	1
A005	16093	C>T	1	0.790274	0.38132	0.38132	3	3	6	0.55	D-loop	Non protein coding			Non protein coding
A006	13703	G>A	0	0.72752	1.03931	2.05613	4	4	8	0.7	ND5	Non synonymous SNV	R	H	probably damaging	alignment	0.999
A006	15959	G>A	0	0.711771	1.01682	2.05613	4	4	8	0.7	tR-Pro	Non protein coding			Non protein coding
A007	8723	G>A	0	0.412666	0.687777	1.81033	3	4	7	0.6	ATP6	Non synonymous SNV	R	Q	Benign	alignment	0.021
A007	16293	A>G	0	0.673529	1.12255	1.81033	3	4	7	0.6	D-loop	Non protein coding			Non protein coding
A010	10361	T>C	0	0.456957	0.652796	0.652796	3	3	6	0.7	ND3	Synymous SNV			Synonymous
A012	15591	G>A	0	0.409623	1.17035	1.17035	4	3	7	0.35	CYTB	Non synonymous SNV	R	Q	probably damaging	alignment	0.999
A014	4412	G>A	0	0.618236	1.03039	3.24624	4	3	7	0.6	tR-Met	Non protein coding			Non protein coding
A014	11410	T>C	0	0.81996	1.3666	3.24624	4	3	7	0.6	ND4	Synymous SNV			Synonymous
A014	12280	A>G	0	0.509548	0.849247	3.24624	4	3	7	0.6	tR-Leu2	Non protein coding			Non protein coding
A016	13201	G>A	0	0.277054	0.395791	0.71821	3	4	7	0.7	ND5	Non synonymous SNV	A	T	probably damaging	sequence annotation	0.999
A016	16519	C>T	1	0.774307	0.322419	0.71821	3	4	7	0.7	D-loop	Non protein coding			Non protein coding
A017	1426	T>C	0	0.461231	0.922462	2.81024	4	4	8	0.5	RNR1	Non protein coding			Non protein coding
A017	3834	G>A	0	0.471651	0.943302	2.81024	4	4	8	0.5	ND1	Synymous SNV			Synonymous
A017	9145	G>A	0	0.472236	0.944472	2.81024	4	4	8	0.5	ATP6	Non synonymous SNV	A	T	probably damaging	sequence annotation	0.999
A018	308	C>T	0	0.892744	1.48791	1.48791	3	3	6	0.6	D-loop	Non protein coding			Non protein coding
A019	119	C>T	1	0.428471	0.952548	0.952548	3	4	7	0.6	D-loop	Non protein coding			Non protein coding
A022	14601	G>A	0	0.715161	1.7879	1.7879	3	4	7	0.4	ND6	Non synonymous SNV	S	G	Benign	sequence annotation	0.084
A023	1767	G>A	0	0.606303	0.866147	2.008	4	3	7	0.7	RNR2	Non protein coding			Non protein coding
A023	6541	G>A	0	0.799299	1.14186	2.008	4	3	7	0.7	COX1	Non synonymous SNV	R	H	probably damaging	alignment	1
A024	6284	G>A	0.443609	0	0.633727	2.69586	4	3	7	0.7	COX1	Synymous SNV			Synonymous
A024	16286	T>T	0.264033	0.707527	0.633563	2.69586	4	3	7	0.7	D-loop	Non protein coding			Non protein coding
A024	16296	C>T	0	1	1.42857	2.69586	4	3	7	0.7	D-loop	Non protein coding			Non protein coding
A026	15270	T>C	0	0.692019	1.73005	1.73005	3	3	6	0.4	CYTB	Non synonymous SNV	L	P	probably damaging	alignment	1
A028	4308	G>A	0	0.254271	0.330552	0.665664	4	4	8	0.7	tR-Ile	Non protein coding			Non protein coding
A028	15565	T>C	0	0.257778	0.335111	0.665664	4	4	8	0.7	CYTB	Synymous SNV			Synonymous
A037	1282	G>A	0	0.387387	0.484234	0.983609	4	3	7	0.8	RNR1	Non protein coding			Non protein coding
A037	16035	G>A	0	0.3995	0.499375	0.983609	4	3	7	0.8	D-loop	Non protein coding			Non protein coding
A039	6178	T>C	0	0.218609	0.312299	0.312299	3	4	7	0.7	COX1	Non synonymous SNV	M	T	probably damaging	alignment	0.987
A042	1339	G>A	0	0.893091	1.11636	1.11636	4	5	9	0.8	RNR1	Non protein coding			Non protein coding
A045	1351	G>A	0	0.527148	0.753069	0.753069	3	4	7	0.7	RNR1	Non protein coding			Non protein coding
A046	4522	T>C	0	0.502168	0.717383	1.6739	3	3	6	0.7	ND2	Non synonymous SNV	L	P	probably damaging	sequence annotation	0.965
A046	13416	A>G	0	0.669565	0.956521	1.6739	3	3	6	0.7	ND5	Synymous SNV			Synonymous
A054	2828	G>A	0	0.166667	0.277778	0.559948	3	4	7	0.6	RNR2	Non protein coding			Non protein coding
A054	15629	C>T	0.169302	0	0.28217	0.559948	3	4	7	0.6	CYTB	Synymous SNV			Synonymous
A056	6930	G>A	0	0.267401	0.445668	1.66166	3	3	6	0.6	COX1	stopgain			Stopgain
A056	9233	T>C	0	0.729594	1.21599	1.66166	3	3	6	0.6	COX3	Synymous SNV			Synonymous
A057	10378	T>C	0	0.7332	w	1.4664	3	4	7	0.5	ND3	Non synonymous SNV	L	P	Benign	alignment	0.111
A061	9478	T>A	0	0.232359	0.387265	0.387265	3	4	7	0.6	COX3	Non synonymous SNV	V	D	possibly damaging	sequence annotation	0.849
A062	3915	G>A	0	0.613576	0.876537	0.876537	3	3	6	0.7	ND1	Synymous SNV			Synonymous
A063	13763	C>G	0	0.272848	0.419766	0.419766	3	3	6	0.65	ND5	Non synonymous SNV	S	C	probably damaging	sequence annotation	0.997
A074	1464	G>A	0	0.263632	0.439387	0.958803	3	4	7	0.6	RNR1	Non protein coding			Non protein coding
A074	12457	G>A	0	0.31165	0.519417	0.958803	3	4	7	0.6	ND5	Non synonymous SNV	A	T	probably damaging	sequence annotation	0.999
A075	195	C>T	0.526817	0	0.658521	2.14324	4	5	9	0.8	D-loop	Non protein coding			Non protein coding
A075	9962	G>A	0	0.320279	0.400349	2.14324	4	5	9	0.8	COX3	Synymous SNV			Synonymous
A075	16093	C>T	0.8675	0	1.08438	2.14324	4	5	9	0.8	D-loop	Non protein coding			Non protein coding
A080	316	G>C	0	0.7706	1.10086	2.91752	3	4	7	0.7	D-loop	Non protein coding			Non protein coding
A080	319	T>C	0	0.768672	1.0981	2.91752	3	4	7	0.7	D-loop	Non protein coding			Non protein coding
A080	3036	G>A	0	0.384306	0.549009	2.91752	3	4	7	0.7	RNR2	Non protein coding			Non protein coding
A080	7951	A>G	0.845691	0.964375	0.169549	2.91752	3	4	7	0.7	COX2	Synymous SNV			Synonymous
A081	15357	A>G	0.26773	0.590909	0.430905	0.430905	4	4	8	0.75	CYTB	Non synonymous SNV	G	E	probably damaging	alignment	1
A084	12730	G>A	0	0.332292	0.443056	0.443056	5	4	9	0.75	ND5	Non synonymous SNV	V	I	Benign	sequence annotation	0.006
A085	901	G>A	0	0.424883	0.606976	0.606976	4	4	8	0.7	RNR1	Non protein coding			Non protein coding
A088	5140	G>A	0	0.153119	0.278398	0.278398	3	4	7	0.55	ND2	Non synonymous SNV	S	N	Benign	alignment	0.004
A089	9139	G>A	0	0.466733	0.666761	0.666761	4	3	7	0.7	ATP6	Non synonymous SNV	A	T	probably damaging	sequence annotation	0.999
A091	943	G>A	0	0.346579	0.577632	0.577632	3	4	7	0.6	RNR1	Non protein coding			Non protein coding
A093	2636	G>A	0	0.290145	1.16058	1.16058	3	3	6	0.25	RNR2	Non protein coding			Non protein coding
A095	14598	T>C	0	0.29595	0.5919	1.71542	5	4	9	0.5	ND6	Non synonymous SNV	I	V	probably damaging	sequence annotation	0.997
A095	15670	T>C	0	0.390306	0.780612	1.71542	5	4	9	0.5	CYTB	Synymous SNV			Synonymous
A095	16093	C>T	0.9699	0.798445	0.34291	1.71542	5	4	9	0.5	D-loop	Non protein coding			Non protein coding
A096	1000	C>T	0.525881	0	0.956147	0.956147	3	3	6	0.55	RNR1	Non protein coding			Non protein coding
A097	185	A>G	1	0.834163	0.23691	1.15087	3	4	7	0.7	D-loop	Non protein coding			Non protein coding
A097	7912	A>G	0.399864	0	0.571234	1.15087	3	4	7	0.7	COX2	Synymous SNV			Synonymous
A097	14840	A>G	0	0.23991	0.342729	1.15087	3	4	7	0.7	CYTB	Non synonymous SNV	N	D	probably damaging	alignment	0.995
A098	4309	G>A	0	0.6415	1.16636	1.67869	4	3	7	0.55	tR-Ile	Non protein coding			Non protein coding
A098	15059	G>A	0	0.281782	0.512331	1.67869	4	3	7	0.55	CYTB	stopgain			Stopgain
A099	1988	G>A	0	0.95903	1.12827	1.12827	4	4	8	0.85	RNR2	Non protein coding			Non protein coding
A102	8269	G>A	0	0.295115	0.491858	0.491858	4	4	8	0.6	COX2	Synymous SNV			Synonymous
A103	3727	T>C	0	0.257919	0.429865	0.429865	4	4	8	0.6	ND1	Non synonymous SNV	S	P	probably damaging	alignment	1
A104	16224	T>C	0.795518	1	0.292117	0.292117	4	4	8	0.7	D-loop	Non protein coding			Non protein coding
A106	16153	G>A	0	0.452716	1.29347	1.29347	4	3	7	0.35	D-loop	Non protein coding			Non protein coding
A112	14560	A>G	0.595801	0.847458	0.35951	0.35951	4	4	8	0.7	ND6	Synymous SNV			Synonymous
A113	1169	G>A	0	0.290413	0.726032	0.726032	4	5	9	0.4	RNR1	Non protein coding			Non protein coding
A115	15297	T>C	0.545591	0.736683	0.293988	0.293988	4	3	7	0.65	CYTB	Non synonymous SNV	I	T	possibly damaging	sequence annotation	0.808
